# Supplementary material
Source: PubMed Central journal article supplement (PMC5074607)
Supplement: supp_pp.16.00774_PP2016-00774R1_Supplemental_Materialfigtbls.pdf [file supp_pp.16.00774_PP2016-00774R1_Supplemental_Materialfigtbls.pdf]

1

2 **Supplemental Material**

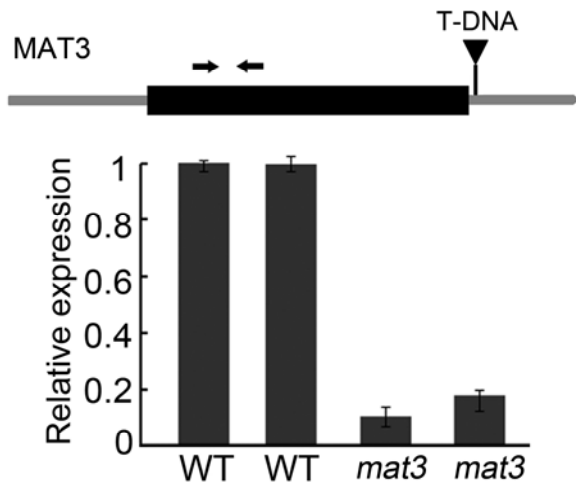

3

4 **Figures S1** Expression of *MAT3* in mature pollen in WT and *mat3*. The arrows indicate the  
5 position of the primers. All measurements represent the average of three biological replicates  
6 with error bars representing the SE.

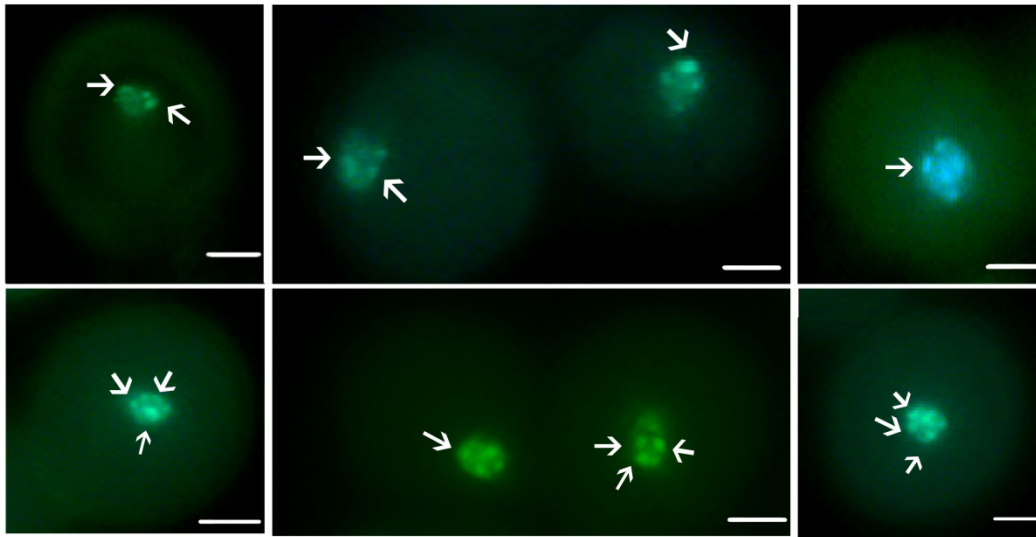

7

8 **Figures S2** Subcellular localization of MAT3. Representative images of mature pollen from  
9 MAT3-GFP transgenic plants. Arrows indicate GFP signals detected in sub-compartments in the  
10 vegetative nucleus. Bars = 5  $\mu$ m

11

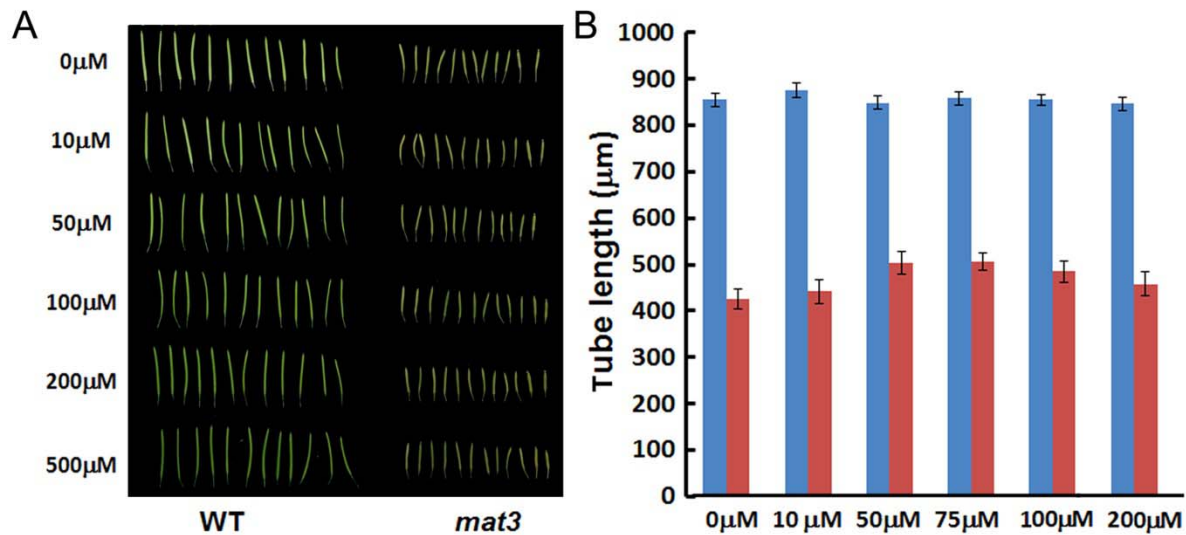

12  
 13 **Figures S3** Exogenous SAM did not correct the *mat3* pollen tube growth defect. **A**, Siliques after  
 14 inflorescence culture with SAM for 7 days. **B**, *In vitro* pollen tube lengths 8 h after adding SAM  
 15 to pollen germination medium. Data are mean  $\pm$  SE of triplicate experiments. 50–100 pollen  
 16 grains for each experiment.

17 **Table S1** Primers used in this study.

| Primer name | Sequence 5' to 3'         |
|-------------|---------------------------|
| mat3-lp     | TGAGGCCTGATGGTAAGACAC     |
| mat3-rp     | TAAAGGGACATCGACAAGT       |
| mat3-CDS-f  | CACCATGGAAACGTTCTTATTACCT |
| mat3-CDS-r  | GGCCTTTGGCTTGAGCGGCT      |
| mat3-pro-f  | CACCTGACGGTTCAAACAATCTTA  |
| mat3-rt-1   | ATGGAAACGTTCTTATTACCT     |
| mat3-rt-2   | GGCCTTTGGCTTGAGCGGCT      |
| mat3-rt-3   | TGAACCGCTG GCCTGTGTTT     |
| LBb1.3      | ATTTTGCCGATTTTCGGAAC      |
| EF1A-qF1    | GAGTACCCACCTTTGGGACG      |
| EF1A-qR1    | TTGGGTCCTTCTTGTCCACG      |
| q-mat3-f    | TTCAGGCTTCTTGGTCAAAT      |
| q-mat3-r    | CTCTGCTGATGTTGGTCTTG      |
| UBQF        | GGTGCTAAGAAGAGGAAGAAT     |
| UBQR        | CTCCTTCTTTTCGGTAAACGT     |

18  
 19 **Table S2.** tRNA modification genes expressed Arabidopsis pollen

| Modified Nucleosides | AGI | RPKM |
|----------------------|-----|------|
|                      |     |      |

|                    |           |       |
|--------------------|-----------|-------|
| D                  | At3g49640 | 1.29  |
| $\psi$             | At1g34150 | 6.19  |
|                    | At2g30320 | 5.95  |
| ncm <sup>5</sup> U | At5g35400 | 2.93  |
|                    | At1g76050 | 2.09  |
|                    | At2g15910 | 84.04 |
|                    | At3g58500 | 67.63 |
|                    | At4g26100 | 51.18 |
|                    | At2g42500 | 41.59 |
|                    | At1g03930 | 32.82 |
|                    | At5g57015 | 26.35 |
|                    | At1g30470 | 15.35 |
|                    | At1g59830 | 5.95  |
|                    | At1g50370 | 5.84  |
|                    | At1g69960 | 5.37  |
|                    | At1g07990 | 4.08  |
|                    | At1g10430 | 3.59  |
|                    | At3g45190 | 1.76  |
| At5g55260          | 1.45      |       |
| At4g26720          | 1.38      |       |
| At5g63860          | 1.27      |       |
| At3g26100          | 1.10      |       |
| At3g19980          | 1.03      |       |
| m <sup>1</sup> A   | At2g45730 | 1.76  |
| m <sup>5</sup> C   | At5g66180 | 1.15  |
| m <sup>7</sup> G   | At1g03110 | 4.38  |
| m <sup>5</sup> U   | At2g28450 | 2.53  |

20  
21  
22  
23  
24  
25  
26  
27  
28  
29
